# Supplementary material for: Overexpressed pseudogenes, DUXAP8 and DUXAP9, promote growth of renal cell carcinoma and serve as unfavorable prognostic biomarkers
Source: publisher site journal article supplement (doi:10.18632/aging.102152), 2019-08-13
Supplement: Supplementary file [file aging-v11i15-102152-supplementary-material-SD1.pdf]

**SUPPLEMENTARY FIGURE**

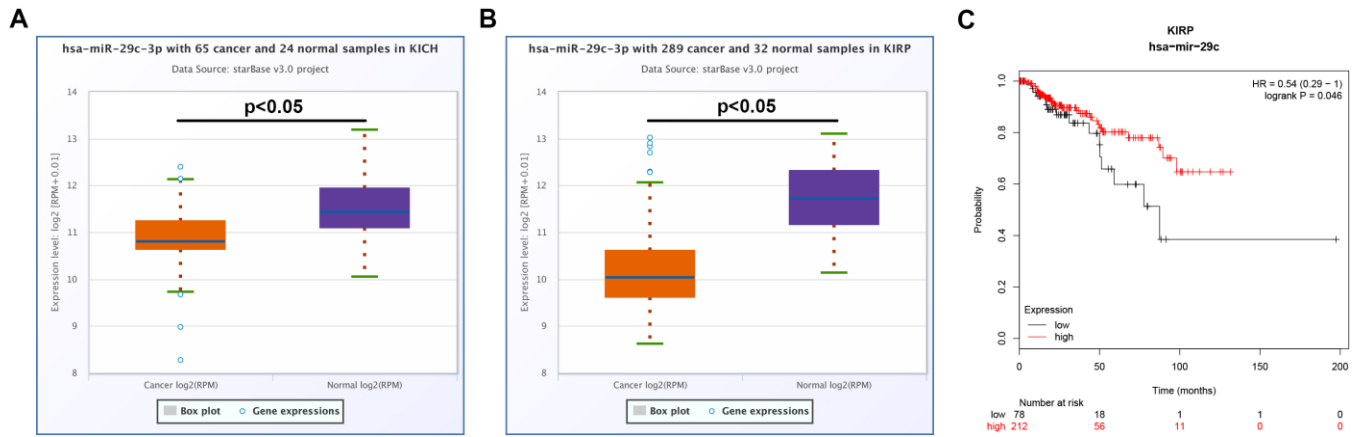

**Supplementary Figure 1. Expression and prognostic values of hsa-miR-29c-3p in chRCC (KICH) and pRCC (KIRP).** (A) Expression level of hsa-miR-29c-3p in chRCC; (B) expression level of hsa-miR-29c-3p in pRCC; (C) prognostic value of hsa-miR-29c-3p in pRCC. “p<0.05” represents statistically significant.
