# Supplementary material for: Overexpressed pseudogenes, DUXAP8 and DUXAP9, promote growth of renal cell carcinoma and serve as unfavorable prognostic biomarkers
Source: publisher site journal article supplement (doi:10.18632/aging.102152), 2019-08-13
Supplement: Supplementary file [file aging-v11i15-102152-supplementary-material-SD2.pdf]

## SUPPLEMENTARY TABLES

Please browse Full Text version to see the data of Supplementary Tables 1 and 4:

**Supplementary Table 1. Dysregulated pseudogenes in clear cell renal cell carcinoma (ccRCC) from dreamBase database.**

**Supplementary Table 2. Dysregulated pseudogenes in clear cell renal cell carcinoma (ccRCC) identified by GEPIA database.**

| Upregulated pseudogenes | Downregulated pseudogenes |
|-------------------------|---------------------------|
| RP5-1120P11.4           | RP11-480I12.5             |
| AC007326.9              | NUDT4P2                   |
| RP4-631H13.6            | ZNF300P1                  |
| APOC1P1                 | RP11-255H23.2             |
| RP11-155G14.5           | AF186192.5                |
| DGCR5                   | TUBBP5                    |
| FER1L4                  | RP11-231P20.2             |
| RP11-255M6.1            | FOLH1B                    |
| HSPA7                   | COX7A2P1                  |
| KRT223P                 | PPP1R36                   |
| FCGR2C                  | TPTEP1                    |
| PTP4A2P2                | MST1L                     |
| HLA-J                   | AP000344.4                |
| HLA-DPB2                | LINC00982                 |
| OR2I1P                  | SLC2A3P1                  |
| LILRA6                  | RP11-12A20.10             |
| CYP21A1P                |                           |
| RP11-693N9.2            |                           |
| DUXAP8                  |                           |
| SDHAP3                  |                           |
| NCF1B                   |                           |
| NCF1C                   |                           |
| OR7E47P                 |                           |
| DUXAP9                  |                           |
| AC093616.4              |                           |
| RP11-75L1.2             |                           |
| RP11-64B16.2            |                           |
| GGTA1P                  |                           |
| NBPF8                   |                           |
| NAPSB                   |                           |

**Supplementary Table 3. The prognostic values of dysregulated pseudogenes in kidney clear cell carcinoma determined by GEPIA database.**

| Upregulated pseudogene | OS <sup>a</sup> | RFS <sup>b</sup> | Downregulated pseudogene | OS          | RFS         |
|------------------------|-----------------|------------------|--------------------------|-------------|-------------|
| RP5-1120P11.4          | No              | Good             | RP11-480I12.5            | Good        | No          |
| <b>AC007326.9</b>      | <b>Poor</b>     | <b>Poor</b>      | <b>NUDT4P2</b>           | <b>Good</b> | <b>Good</b> |
| RP4-631H13.6           | No              | No               | ZNF300P1                 | No          | No          |
| APOC1P1                | Poor            | No               | <b>RP11-255H23.2</b>     | <b>Good</b> | <b>Good</b> |
| RP11-155G14.5          | No              | No               | <b>AF186192.5</b>        | <b>Good</b> | <b>Good</b> |
| DGCR5                  | No              | No               | TUBBP5                   | No          | Good        |
| FER1L4                 | Poor            | No               | RP11-231P20.2            | Good        | No          |
| RP11-255M6.1           | No              | No               | FOLH1B                   | Good        | No          |
| HSPA7                  | Poor            | No               | COX7A2P1                 | No          | No          |
| KRT223P                | No              | Poor             | PPP1R36                  | No          | No          |
| FCGR2C                 | No              | No               | TPTEP1                   | No          | No          |
| PTP4A2P2               | Good            | Good             | MST1L                    | No          | Good        |
| HLA-J                  | No              | No               | AP000344.4               | No          | No          |
| HLA-DPB2               | No              | No               | LINC00982                | No          | Good        |
| OR211P                 | No              | No               | <b>SLC2A3P1</b>          | <b>Good</b> | <b>Good</b> |
| LILRA6                 | No              | No               | RP11-12A20.10            | No          | No          |
| CYP21A1P               | Poor            | No               |                          |             |             |
| RP11-693N9.2           | No              | No               |                          |             |             |
| <b>DUXAP8</b>          | <b>Poor</b>     | <b>Poor</b>      |                          |             |             |
| SDHAP3                 | No              | No               |                          |             |             |
| NCF1B                  | No              | No               |                          |             |             |
| NCF1C                  | No              | No               |                          |             |             |
| OR7E47P                | Good            | Good             |                          |             |             |
| <b>DUXAP9</b>          | <b>Poor</b>     | <b>Poor</b>      |                          |             |             |
| AC093616.4             | No              | No               |                          |             |             |
| RP11-75L1.2            | Poor            | No               |                          |             |             |
| RP11-64B16.2           | No              | No               |                          |             |             |
| GGTA1P                 | No              | No               |                          |             |             |
| NBPF8                  | Poor            | No               |                          |             |             |
| NAPSB                  | No              | No               |                          |             |             |

<sup>a</sup>OS, overall survival;

<sup>b</sup>RFS, disease free survival.

**Supplementary Table 4. Potential target genes of has-miR-29c-3p predicted by miRNet database.**
